## **Multimodal surface coils for low field MR imaging**

Yunkun Zhao<sup>1</sup>, Aditya A Bhosale<sup>1</sup>, Xiaoliang Zhang<sup>1,2\*</sup>

<sup>1</sup>Department of Biomedical Engineering, <sup>2</sup>Department of Electrical Engineering, State University of New York at Buffalo, Buffalo, NY, United States

\*Corresponding author:

Xiaoliang Zhang, Ph.D.  
Bonner Hall 215E  
Department of Biomedical Engineering  
State University of New York at Buffalo  
Buffalo, NY, 14226  
U.S.A.

Email: [xzhang89@buffalo.edu](mailto:xzhang89@buffalo.edu)

## **Abstract**

Low field MRI is safer and more cost effective than the high field MRI. One of the inherent problems of low field MRI is its low signal-to-noise ratio or sensitivity. In this work, we introduce a multimodal surface coil technique for signal excitation and reception to improve the RF magnetic field ( $B_1$ ) efficiency and potentially improve MR sensitivity. The proposed multimodal surface coil consists of multiple identical resonators that are electromagnetically coupled to form a multimodal resonator. The field distribution of its lowest frequency mode is suitable for MR imaging applications. The prototype multimodal surface coils are built, and the performance is investigated and validated through numerical simulation, standard RF measurements and tests, and comparison with the conventional surface coil at low fields. Our results show that the  $B_1$  efficiency of the multimodal surface coil outperforms that of the conventional surface coil which is known to offer the highest  $B_1$  efficiency among all coil categories, i.e., volume coil, half-volume coil and surface coil. In addition, in low-field MRI, the required low-frequency coils often use large value capacitance to achieve the low resonant frequency which makes frequency tuning difficult. The proposed multimodal surface coil can be conveniently tuned to the required low frequency for low-field MRI with significantly reduced capacitance value, demonstrating excellent low-frequency operation capability over the conventional surface coil.

**Keywords: RF coil, surface coil, multimodal RF coil, low field, stack-up coil,  $B_1$  efficiency, MR imaging.**

# 1. Introduction

Magnetic resonance imaging (MRI) is a promising tool to provide detailed images depicting the internal structures [1-6], functions [7-14] and metabolic processes [15-23] of the living system without the use of ionizing radiation. Traditional high-field MRI systems, typically operating at 1.5 Tesla or higher, are prevalent in clinical settings due to their high signal-to-noise ratio (SNR), which contributes to their ability to produce high-resolution images and increased spectral dispersion [24-37]. However, MRI systems operating at higher field strengths are often associated with high operating costs [38, 39], substantial power requirements [40-44], radio frequency (RF) challenges [45-61] and potential safety concerns, especially for patients with certain medical implants or conditions that contraindicate exposure to strong magnetic fields [62, 63]. In recent years, there has been a growing interest in low-field MRI systems, defined as those operating at magnetic field strengths in the range from 0.25 Tesla to 1.0 Tesla [64-66]. These systems offer several advantages over their high-field counterparts, including lower operating costs, reduced power consumption, and improved safety profile, making them more accessible and suitable for a wider range of patients [64-68].

A major challenge associated with low field MRI is the inherently low signal-to-noise ratio (SNR) [69-72], which significantly limits the spatial/temporal resolution and specificity of the image [73-75]. It is known that the MR SNR is directly related to the RF magnetic field  $B_1$ , showing a linear relationship [69]. Therefore, improving the efficiency of the  $B_1$  field generated by RF coils may be a possible way to improve the SNR.

Conventional surface coils, which provide the highest  $B_1$  efficiency among all RF coil types (i.e. surface coil, volume coil and half-volume coil), still show limitations in providing sufficient  $B_1$  fields for signal reception/excitation in many imaging applications, resulting in suboptimal image sensitivity and resolution. To address this challenge, in this work we introduce and investigate an innovative solution: the multimodal surface coil. This novel design pushes the  $B_1$  boundary and significantly improves the  $B_1$  fields over those provided by conventional surface coils, with the potential to significantly enhance MR SNR. The core concept of the multimodal surface coil is based on a set of stacked resonators that are electromagnetically coupled to form a multimodal RF resonator [76]. This design not only improves  $B_1$  efficiency, but also incorporates a low frequency tuning capability. Such a feature is particularly advantageous in low-field MRI, where tuning at the corresponding low frequencies poses a notable challenge. To validate our

design, we have performed extensive full-wave electromagnetic simulations alongside standard RF bench tests and measurements. The proposed design is further validated by a comparison study with a conventional surface coil.

## 2. Methods

### 2.1 EM simulation

Figure 1 displays the simulation model of a multimodal surface coil. This coil is comprised of seven resonators or coil loops constructed with 6.35 mm wide copper tape. Six of these are identical square coils, each with a side length of 10 cm and equipped with a 60pF capacitance tuning capacitor for tuning to 42 MHz. The central coil contains an impedance matching circuit essential for driving the multimodal surface coil. A spacing of 5 mm between the coils is designed to enhance mutual inductive coupling, with the entire stacked assembly reaching a height of 3 cm. Our design, featuring multiple coils, inherently supports four resonant modes within the coupled stack. We have chosen to utilize the lowest resonant mode for imaging applications due to its superior field strength efficiency, a critical factor in optimizing image quality in MRI. A conventional surface coil has been used as a comparative setup. Mirroring the multimodal resonator, it was also defined by a 10 cm length. All designs, including the multimodal surface coil, were built using a 6.35 mm wide copper sheet conductor, tuned to 21.3 MHz, and impedance-matched to 50 ohms. In comparison study, the proposed multimodal surface coil and conventional surface coil are placed 1 cm below a tank phantom with a dimension of  $20 \times 10 \times 20$  cm<sup>3</sup>. The conductivity  $\sigma = 0.39$  S/m and the relative permittivity value  $\epsilon_r = 188.76$  are used in the simulation phantom to imitate the human brain tissue properties at 21 MHz. Performance assessments of the multimodal surface coil involved analyzing scattering parameters, and B<sub>1</sub> efficiency, using field distribution plots. All electromagnetic field plots were normalized to 1 W of accepted power. Numerical results of the proposed designs were obtained using the electromagnetic simulation software CST Studio Suite (Dassault Systèmes, Paris, France).

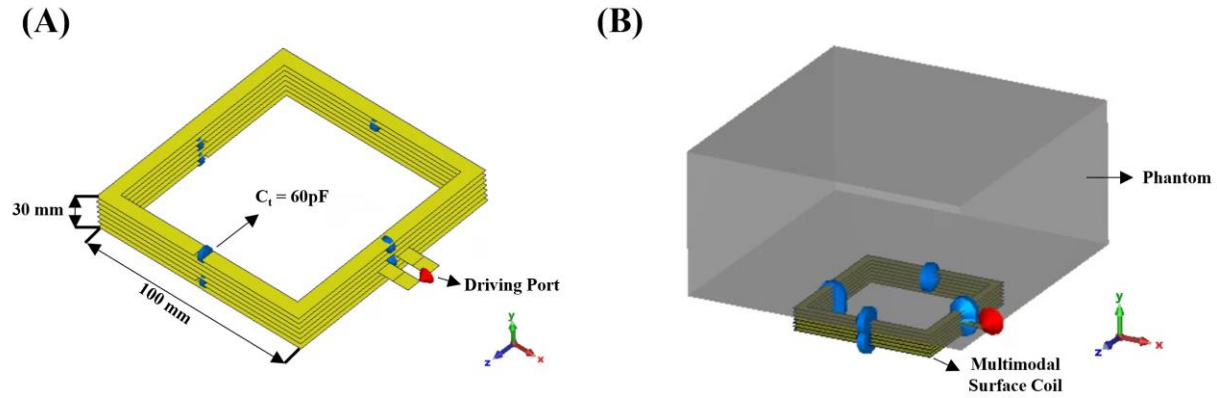

**Figure 1.** (A) Simulation model and size of multimodal surface coil. (B) Proposed multimodal surface coil loaded with a cuboid phantom.

## 2.2 Bench Test Model Assembly

Figure 2 shows photographs and dimensions of bench test models of the multimodal surface coil and conventional surface coils. The bench test models have the same dimensions as the simulation model. The conductors of the multimodal surface coils were built with 6.35 mm wide copper tape and on a 3D printed polylactide structure. The imaging resonant frequency was tuned to 21 MHz and matched to 50 ohms by careful selection of the capacitance value on each coil. We used 7 identical fixed-tuning capacitors with 39 pF capacitance. The matching circuit was implemented as shown in Figure 2A. One capacitor with 330 pF connected in parallel to the feeding line was employed for impedance matching.

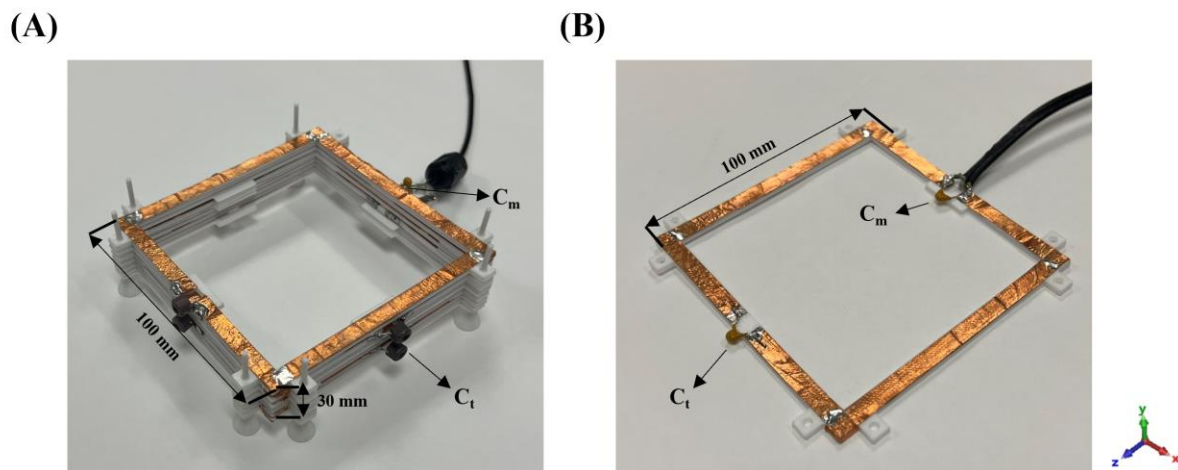

**Figure 2.** (A) Bench test model of multimodal surface coil. (B) Bench test model of conventional surface coil.

For comparison, a conventional surface coil [15] has also been made. The conventional surface coil has the same dimensions as their simulation model and the multimodal surface coil. It was also built using 6.35 mm width thick copper tape on a 3D printed polylactide structure and was tuned to 21 MHz and matched to 50 ohms by tuning capacitors and a matching circuit. The  $B_1$  field strength and distribution have been visualized by a sniffer positioning system combined with a magnetic and electric field measurement setup shown in Figure 3 in an unloaded case. The measurement setup includes a sniffer (H-field probe) which integrated to a high-resolution router machine (Genmitsu CNC PROVerXL 4030) for positioning of the field probe and detect the  $B_1$  field generated by the RF coil in 3D space. The probe is connected to a vector network analyzer (VNA) from Keysight, E5061B, Santa Clara, CA, USA. The raw data, including the output and accepted power and scattering parameters acquired from VNA, will be transmitted to computer and processed by MATLAB to calculate the  $B_1$  field efficiency map. The  $B_1$  field efficiency map is obtained for a  $10 \times 10 \text{ cm}^2$  X-Z plane slice located 1 cm above the RF coils and a  $7 \times 10 \text{ cm}^2$  X-Y plane slice located 2 cm above the RF coils with each measurement point spaced at intervals of 2.5 mm. All results were normalized to 1 W of accepted power.

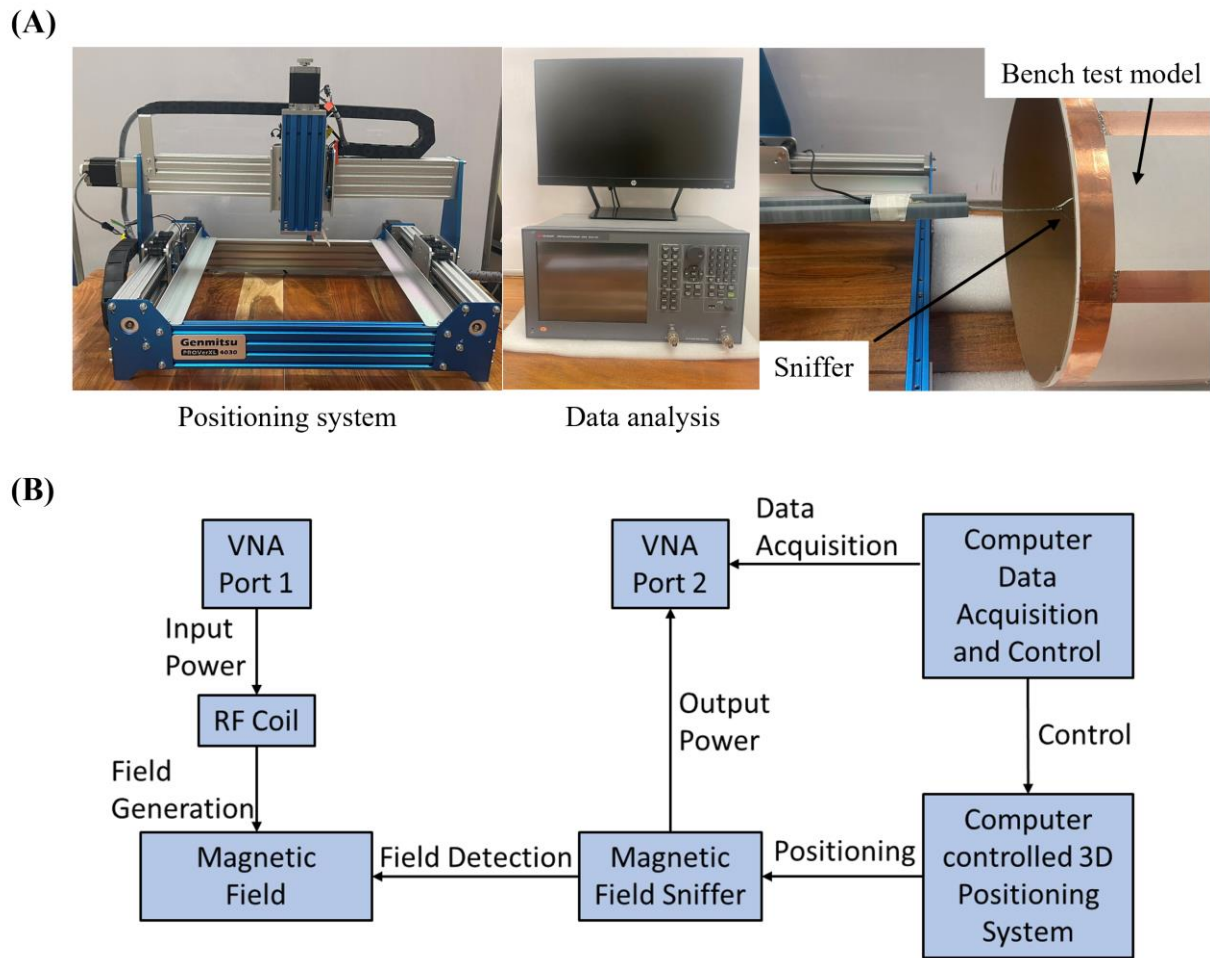

**Figure 3.** (A) Photograph of measurement setup including the sniffer-positioning system, network analyzer and the data process computer. (B) Schematic of the measurement workflow to obtain  $B_1$  field efficiency map.

## 3. Results

### 3.1 Simulated Resonant Frequency and Field Distribution

Figure 4 presents the simulated scattering parameters vs frequency for the multimodal surface coil. This graph indicates the emergence of strong coupling between the coils, which manifests as four distinct split resonant peaks. The highest of these peaks occurs at 79 MHz, while the lowest, which is pertinent for imaging purposes, is observed at 21 MHz. It is noteworthy that each coil in the originally resonates at 42 MHz, underscoring the effectiveness of our tuning approach using a

relatively low capacitance value to achieve a lower resonant frequency for a coil of the same size. In comparison, a conventional surface coil of the same size requires a 200pF capacitance to reach 21 MHz, leading to less accurate and convenient frequency tuning. In Figure 5, we illustrate the  $B_1$  field efficiency maps across Y-Z, X-Z, and X-Y planes within the phantom, positioned at the center of the axis. These plots visualize the  $B_1$  field efficiency of the multimodal surface coils. The results from these simulations demonstrate that our multimodal surface coil exhibits a stronger  $B_1$  field efficiency while maintaining a  $B_1$  field distribution comparable to that of a conventional surface coil.

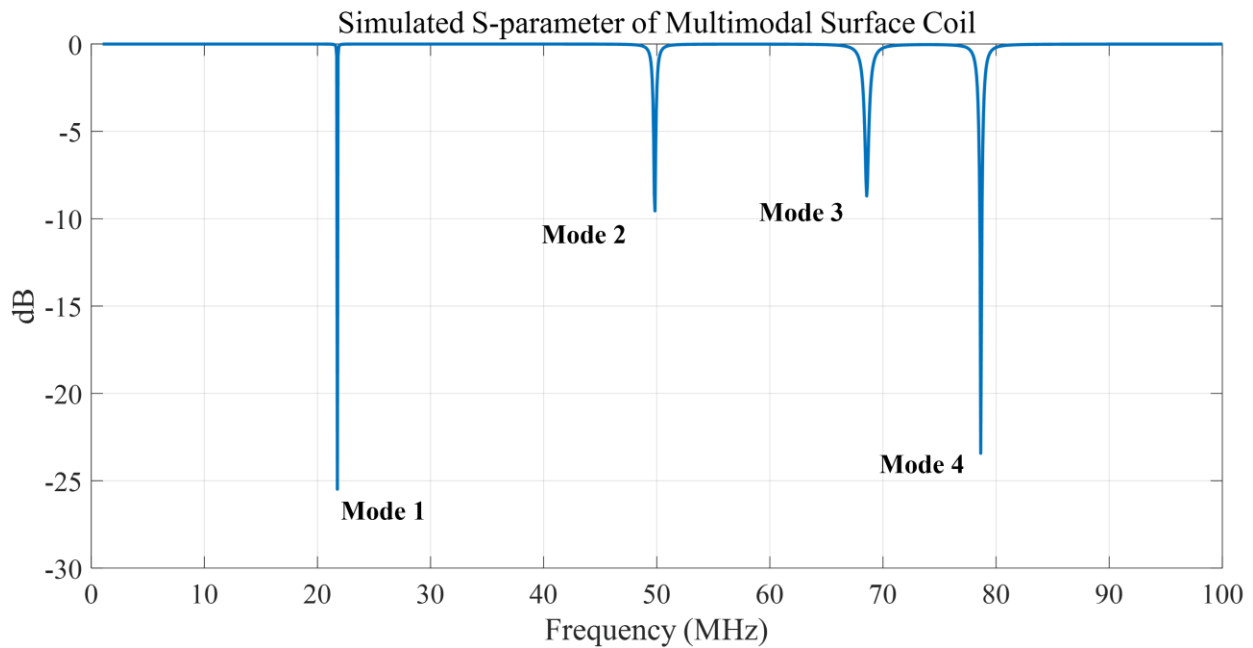

**Figure 4.** Simulated scattering parameters vs. frequency of the multimodal surface coil.

## Simulated Multimodal Surface Coil $B_1$ field

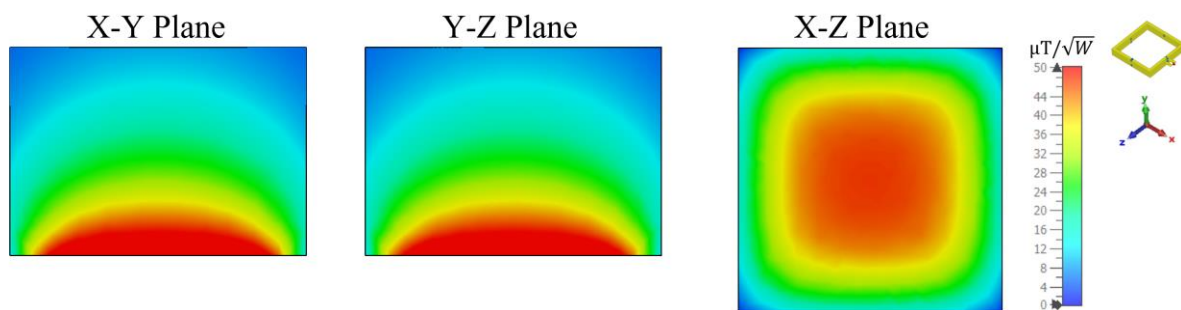



**Figure 5.** Simulated Y-Z, X-Y, and X-Z plane B field efficiency maps inside phantom generated by multimodal surface coils

### 3.2 Measured Scattering Parameters and Field Distribution

Figure 6 shows that the S-parameter vs. frequency plots of the coupled stack-up coil are in good agreement with the simulation results. Four resonant modes with 21.8 MHz, 58.9 MHz, 73.6 MHz, and 85.4 MHz were formed. Figure 7 shows the  $B_1$  field efficiency distribution map on X-Y, Y-Z, and X-Z planes measured with a 3-D magnetic field mapping system. Multimodal surface coil shows strong B field efficiency and similar field distribution pattern on all three planes and is in accordance with the simulation result, which also indicates that the simulation results are accurate and reliable.

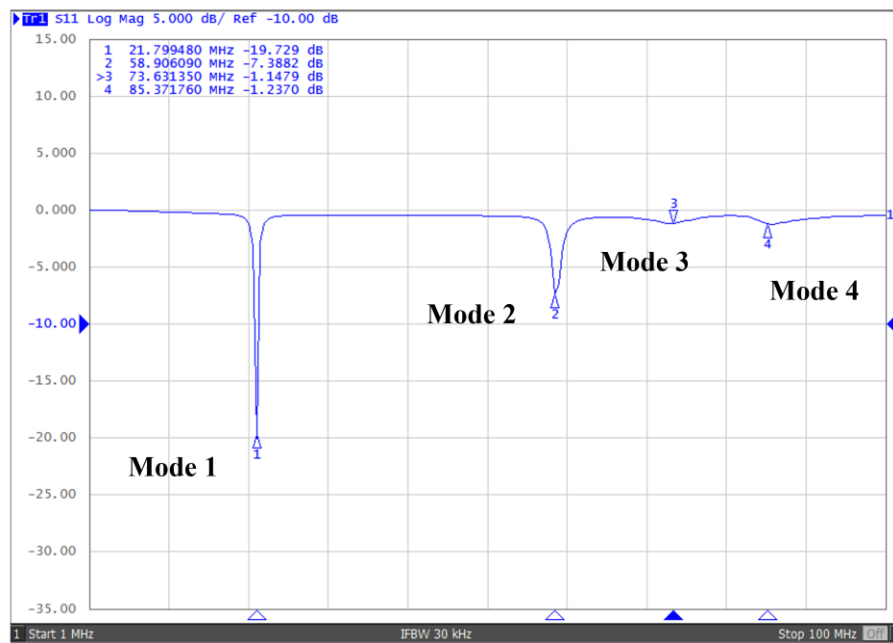

**Figure 6.** Scattering parameters vs. frequency of the bench test model of multimodal surface coils.

## Measured Multimodal Surface Coil B<sub>1</sub> field

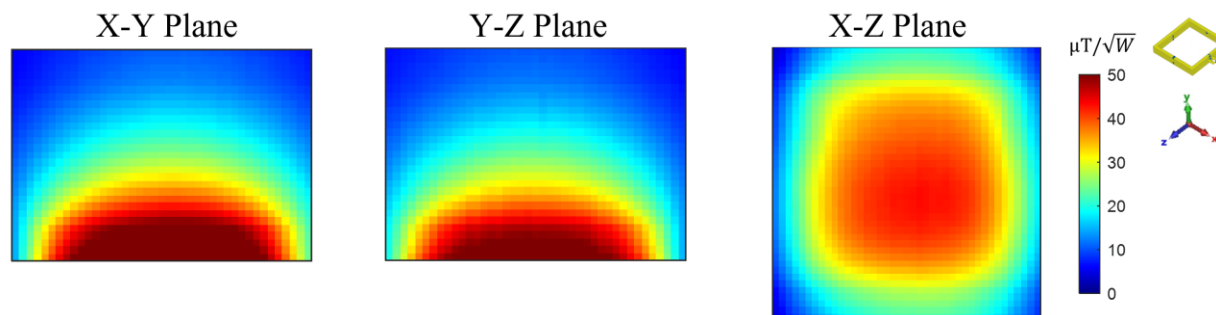

**Figure 7.** Measured B field efficiency maps on the X-Y, Y-Z, and X-Z plane of multimodal surface coil.

### 3.3 Field Distribution and Efficiency Evaluation

Figure 8 provides a comparative analysis of the simulated B<sub>1</sub> field efficiency between the multimodal surface coil, and a conventional surface coil. The results demonstrate that, despite maintaining a field distribution similar to that of the conventional surface coil, the multimodal surface coil exhibits a significantly higher B<sub>1</sub> field efficiency. This finding is crucial as it underscores the effectiveness of the multimodal design in improving the quality of MRI imaging. In Figure 7B, we present a 1-D plot of the B<sub>1</sub> field efficiency, correlating to the vertical and horizontal dashed lines depicted in Figure 7A. This graphical representation provides a detailed insight into the spatial efficiency of the B<sub>1</sub> field. Notably, the average B<sub>1</sub> field efficiency generated by the multimodal surface coil surpasses that of the conventional surface coil by 46.8% along the X-axis, measured at a position 2 cm above the coil.

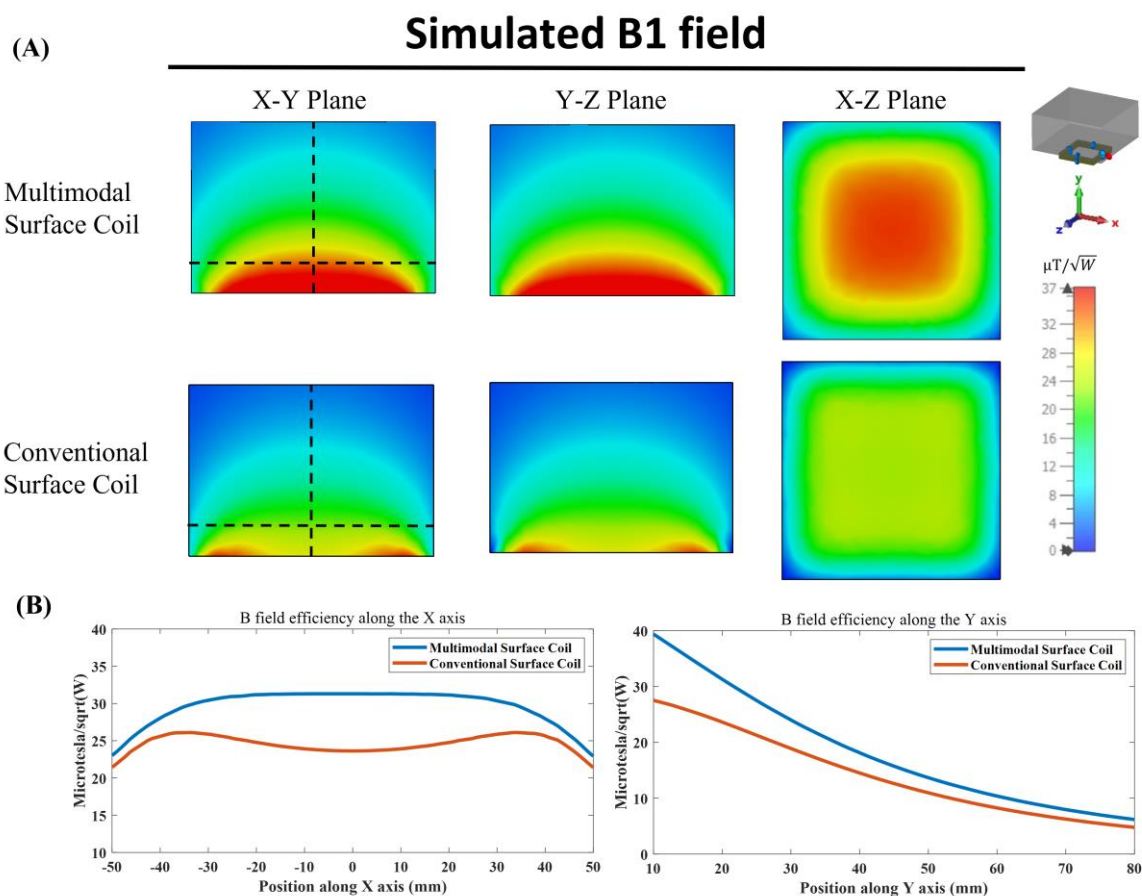

**Figure 8.** (A) Simulated Y-Z, X-Y, and X-Z plane B field efficiency maps inside phantom generated by multimodal surface coils, and conventional surface coil. Y-Z and X-Y planes are at the center of the coil and X-Z plane is 2 cm above the coil. (B) 1-D plot of B<sub>1</sub> field efficiency along the vertical and horizontal dashed line shown in (A).

Figure 9 presents the comparison of the B field efficiency between the bench test model of the multimodal surface coil and the conventional coil. The measured B-field efficiency distribution and strength are found to be in alignment with our simulation results. This congruence is vital as it validates our design, confirming that the multimodal surface coil possesses a stronger B<sub>1</sub> field efficiency within the imaging area compared to the conventional surface coil.

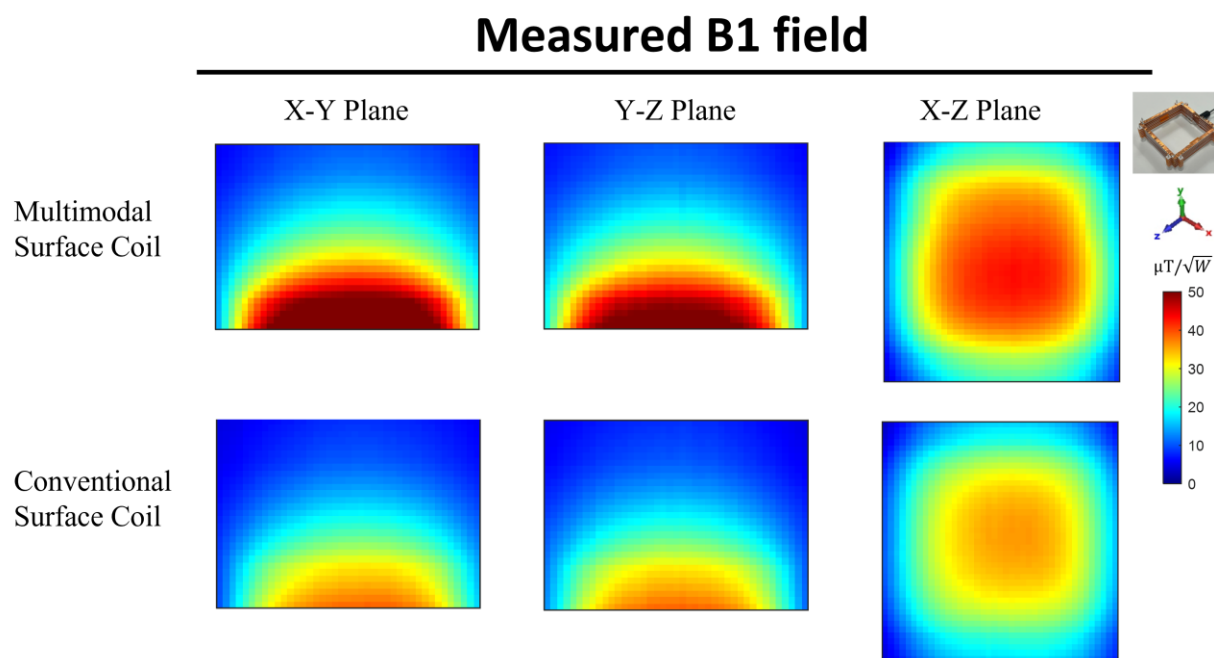

**Figure 9.** Comparison between measured B field efficiency maps on the X-Y, Y-Z, and X-Z plane of multimodal surface coils and conventional surface coil.

## 4. Discussion

Due to the use of the lowest frequency mode that possesses an MR-demanded field distribution, the multimodal surface coil demonstrates the excellent capability for low frequency or low field MR imaging applications in humans. To increase the resonant frequency of the proposed multimodal surface coil to exploit its potential in high field MR imaging applications, one tangible way that can be applied is to reduce the inductance of the circuit. This can be achieved by reducing the size of the coil. With the increased frequency by downsizing the coil, it is possible to generate a more efficient reception/excitation approach using the proposed multimodal surface coil technique for high field small animal MR imaging with expected higher sensitivity over the traditional surface coils [77].

If an appropriate decoupling technique is applied, the proposed multimodal surface coils can potentially be used as building blocks to design multichannel coil arrays to either improve SNR and imaging coverage, or to enable parallel imaging for accelerated signal excitation and reception. Due to their multimodal or multi-resonance nature, decoupling of multimodal coil elements could

be a challenging task. The magnetic wall or ICE decoupling technique could be a working method for this electromagnetic decoupling need due to its unique broadband decoupling capability. In addition, high impedance design can also potentially be used to achieve the required inter-coil decoupling in multichannel coil arrays.

## 5. Conclusion

In this work, a multimodal surface coil design has been proposed and the prototype multimodal surface coil has been successfully developed for low field MR imaging applications. The proposed multimodal surface RF coil has demonstrated significant improvements in  $B_1$  efficiency over conventional surface coils, potentially leading to improved SNR for low field MRI, where low SNR is a major drawback, limiting spatial and temporal resolutions and spectral dispersion. Due to the use of the lowest frequency mode, the proposed multimodal surface coil design also helps to achieve low frequency tuning which is technically challenging at low magnetic fields.

## Acknowledgments

This work is supported in part by the NIH under a BRP grant U01 EB023829 and by the State University of New York (SUNY) under SUNY Empire Innovation Professorship Award.

## References

- [1] K. Ugurbil *et al.*, "Imaging at high magnetic fields: initial experiences at 4 T," *Magn Reson Q*, vol. 9, no. 4, pp. 259-277, 1993.
- [2] J. Zhang *et al.*, "Decreased gray matter volume in the left hippocampus and bilateral calcarine cortex in coal mine flood disaster survivors with recent onset PTSD," *Psychiatry Res*, vol. 192, no. 2, pp. 84-90, May 31 2011, doi: 10.1016/j.psychres.2010.09.001.
- [3] B. Wu *et al.*, "7T human spine imaging arrays with adjustable inductive decoupling," *IEEE Trans Biomed Eng*, vol. 57, no. 2, pp. 397-403, Feb 2010. [Online]. Available: [http://www.ncbi.nlm.nih.gov/entrez/query.fcgi?cmd=Retrieve&db=PubMed&dopt=Citation&list\\_uids=19709956](http://www.ncbi.nlm.nih.gov/entrez/query.fcgi?cmd=Retrieve&db=PubMed&dopt=Citation&list_uids=19709956)
- [4] S. Qi *et al.*, "Anomalous gray matter structural networks in recent onset post-traumatic stress disorder," *Brain Imaging Behav*, vol. 12, no. 2, pp. 390-401, Apr 2018, doi: 10.1007/s11682-017-9693-z.

- [5] R. Krug *et al.*, "Ultrashort echo time MRI of cortical bone at 7 tesla field strength: A feasibility study," *J Magn Reson Imaging*, vol. 34, no. 3, pp. 691-695, Jul 18 2011. [Online]. Available: [http://www.ncbi.nlm.nih.gov/entrez/query.fcgi?cmd=Retrieve&db=PubMed&dopt=Citation&list\\_uids=21769960](http://www.ncbi.nlm.nih.gov/entrez/query.fcgi?cmd=Retrieve&db=PubMed&dopt=Citation&list_uids=21769960)
- [6] Y. X. Wang, G. G. Lo, J. Yuan, P. E. Larson, and X. Zhang, "Magnetic resonance imaging for lung cancer screen," *J Thorac Dis*, vol. 6, no. 9, pp. 1340-8, Sep 2014, doi: 10.3978/j.issn.2072-1439.2014.08.43.
- [7] S. Ogawa, T. M. Lee, A. R. Kay, and D. W. Tank, "Brain magnetic resonance imaging with contrast dependent on blood oxygenation," *Proc Natl Acad Sci U S A*, vol. 87, no. 24, pp. 9868-72, Dec 1990, doi: 10.1073/pnas.87.24.9868.
- [8] S. Ogawa *et al.*, "Functional brain mapping by blood oxygenation level-dependent contrast magnetic resonance imaging. A comparison of signal characteristics with a biophysical model," *Biophys J*, vol. 64, no. 3, pp. 803-12, Mar 1993, doi: 10.1016/S0006-3495(93)81441-3.
- [9] W. Chen, T. Kato, X. H. Zhu, J. Strupp, S. Ogawa, and K. Ugurbil, "Mapping of lateral geniculate nucleus activation during visual stimulation in human brain using fMRI," *Magn Reson Med*, vol. 39, no. 1, pp. 89-96, Jan 1998, doi: 10.1002/mrm.1910390115.
- [10] K. Ugurbil, X. Hu, W. Chen, X. H. Zhu, S. G. Kim, and A. Georgopoulos, "Functional mapping in the human brain using high magnetic fields," *Philos. Trans. R Soc. Lond. B Biol. Sci.*, vol. 354, no. 1387, pp. 1195-213, 1999.
- [11] R. S. Menon, S. Ogawa, X. Hu, J. P. Strupp, P. Anderson, and K. Ugurbil, "BOLD based functional MRI at 4 Tesla includes a capillary bed contribution: echo-planar imaging correlates with previous optical imaging using intrinsic signals," *Magn Reson Med*, vol. 33, no. 3, pp. 453-9, Mar 1995, doi: 10.1002/mrm.1910330323.
- [12] S. Qi *et al.*, "Cortical inhibition deficits in recent onset PTSD after a single prolonged trauma exposure," *Neuroimage Clin*, vol. 3, pp. 226-33, 2013, doi: 10.1016/j.nicl.2013.08.013.
- [13] L. P. Liu *et al.*, "Diagnostic Performance of Diffusion-weighted Magnetic Resonance Imaging in Bone Malignancy: Evidence From a Meta-Analysis," *Medicine (Baltimore)*, vol. 94, no. 45, p. e1998, Nov 2015, doi: 10.1097/MD.0000000000001998.
- [14] X. Zhu, X. Zhang, S. Tang, S. Ogawa, K. Ugurbil, and W. Chen, "Probing fast neuronal interaction in the human ocular dominate columns based on fMRI BOLD response at 7 Tesla," in *Proceedings of the 9th Annual Meeting of ISMRM, Glasgow, Scotland, 2001*.
- [15] J. J. H. Ackerman, T. H. Grove, G. G. Wong, D. G. Gadian, and G. K. Radda, "Mapping of metabolites in whole animals by <sup>31</sup>P NMR using surface coils," *Nature*, vol. 283, pp. 167-170, 1980.
- [16] J. Kurhanewicz *et al.*, "Hyperpolarized (<sup>13</sup>C) MRI: Path to Clinical Translation in Oncology," *Neoplasia*, vol. 21, no. 1, pp. 1-16, Jan 2019, doi: 10.1016/j.neo.2018.09.006.
- [17] H. Dafni *et al.*, "Hyperpolarized <sup>13</sup>C spectroscopic imaging informs on hypoxia-inducible factor-1 and myc activity downstream of platelet-derived growth factor receptor," *Cancer Res*, vol. 70, no. 19, pp. 7400-10, Oct 1 2010. [Online]. Available: [http://www.ncbi.nlm.nih.gov/entrez/query.fcgi?cmd=Retrieve&db=PubMed&dopt=Citation&list\\_uids=20858719](http://www.ncbi.nlm.nih.gov/entrez/query.fcgi?cmd=Retrieve&db=PubMed&dopt=Citation&list_uids=20858719)
- [18] F. Du *et al.*, "In vivo evidence for cerebral bioenergetic abnormalities in schizophrenia measured using <sup>31</sup>P magnetization transfer spectroscopy," *JAMA Psychiatry*, vol. 71, no. 1, pp. 19-27, Jan 2014, doi: 10.1001/jamapsychiatry.2013.2287.
- [19] F. Du, X. H. Zhu, H. Qiao, X. Zhang, and W. Chen, "Efficient in vivo <sup>31</sup>P magnetization transfer approach for noninvasively determining multiple kinetic parameters and metabolic fluxes of ATP metabolism in the human brain," *Magn Reson Med*, vol. 57, no. 1, pp. 103-14, Jan 2007, doi: 10.1002/mrm.21107.
- [20] H. Lei, X. H. Zhu, X. L. Zhang, K. Ugurbil, and W. Chen, "In vivo <sup>31</sup>P magnetic resonance spectroscopy of human brain at 7 T: an initial experience," *Magn Reson Med*, vol. 49, no. 2, pp. 199-205, Feb 2003. [Online]. Available: [http://www.ncbi.nlm.nih.gov/entrez/query.fcgi?cmd=Retrieve&db=PubMed&dopt=Citation&list\\_uids=12541238](http://www.ncbi.nlm.nih.gov/entrez/query.fcgi?cmd=Retrieve&db=PubMed&dopt=Citation&list_uids=12541238).
- [21] X. Zhang, X. H. Zhu, R. Tian, Y. Zhang, H. Merkle, and W. Chen, "Measurement of arterial input function of <sup>17</sup>O water tracer in rat carotid artery by using a region-defined (REDE) implanted vascular RF coil," *MAGMA*, vol. 16, no. 2, pp. 77-85, Jul 2003, doi: 10.1007/s10334-003-0013-9.
- [22] X. L. Aranguren *et al.*, "Multipotent adult progenitor cells sustain function of ischemic limbs in mice," *J Clin Invest*, vol. 118, no. 2, pp. 505-14, Feb 2008, doi: 10.1172/JCI31153.
- [23] X. Zhu *et al.*, "High-field <sup>17</sup>O study of 3D CMRO<sub>2</sub> imaging in human visual cortex," in *Proceedings of the 14th Annual Meeting of ISMRM, Seattle, USA, 2006*, p. 409.
- [24] C. M. Collins and M. B. Smith, "Signal-to-Noise Ratio and Absorbed power as functions of main magnetic field strength, and definition of "90°" RF pulse for the head in the birdcage coil," *Magn Reson Med*, vol. 45, pp. 684-691, 2001.
- [25] C. M. Collins *et al.*, "Different excitation and reception distributions with a single-loop transmit-receive surface coil near a head-sized spherical phantom at 300 MHz," *Magn Reson Med*, vol. 47, no. 5, pp. 1026-8, 2002.
- [26] D. I. Hoult, C. N. Chen, and V. J. Sank, "The field dependence of NMR imaging. II. Arguments concerning an optimal field strength," *Magn Reson Med*, vol. 3, no. 5, pp. 730-46, 1986.

- [27] H. Barfuss, H. Fischer, D. Hentschel, R. Ladebeck, and J. Vetter, "Whole-body MR imaging and spectroscopy with a 4-T system," *Radiology*, vol. 169, no. 3, pp. 811-6, 1988.
- [28] X. Zhang and J. X. Ji, "Parallel and sparse MR imaging: methods and instruments-Part 1," *Quant Imaging Med Surg*, vol. 4, no. 1, pp. 1-3, Feb 2014, doi: 10.3978/j.issn.2223-4292.2014.03.01.
- [29] J. X. Ji and X. Zhang, "Parallel and sparse MR imaging: methods and instruments-Part 2," *Quant Imaging Med Surg*, vol. 4, no. 2, pp. 68-70, Apr 2014, doi: 10.3978/j.issn.2223-4292.2014.04.16.
- [30] Z. Wei *et al.*, "5T magnetic resonance imaging: radio frequency hardware and initial brain imaging," *Quant Imaging Med Surg*, vol. 13, no. 5, pp. 3222-3240, May 1 2023, doi: 10.21037/qims-22-945.
- [31] B. Wu *et al.*, "Acquisition of 7T Human Spine Imaging," in *Proceedings of the 17th Annual Meeting of ISMRM, Honolulu, USA, 2009*, p. 3187.
- [32] X. Zhang, L. DelaBarre, K. Payne, M. Waks, G. Adriany, and K. Ugurbil, "A Wrap-on Decoupled Coaxial Transmission Line (CTL) Transceiver Array for Head MR Imaging at 10.5T," *Proc Int Soc Magn Reson Med Sci Meet Exhib Int Soc Magn Reson Med Sci Meet Exhib*, vol. 31, Jun 2023. [Online]. Available: <https://www.ncbi.nlm.nih.gov/pubmed/37609489>.
- [33] Y. Li, Y. Pang, D. Vigneron, O. Glenn, D. Xu, and X. Zhang, "Parallel MRI performance evaluation of a novel 32 channel fetal array at 1.5 T," in *Int. Soc. Mag. Reson. Med*, 2012, p. P569.
- [34] Y. Li *et al.*, "In-vivo human brain imaging at 5 T using a 48 channel Tx-Rx array," *Proceedings of the 29th Annual Meeting of ISMRM*, p. 1572, 2021.
- [35] X. Zhang, K. Ugurbil, R. Sainati, and W. Chen, "An inverted-microstrip resonator for human head proton MR imaging at 7 tesla," *IEEE Trans Biomed Eng*, vol. 52, no. 3, pp. 495-504, Mar 2005. [Online]. Available: [http://www.ncbi.nlm.nih.gov/entrez/query.fcgi?cmd=Retrieve&db=PubMed&dopt=Citation&list\\_uids=15759580](http://www.ncbi.nlm.nih.gov/entrez/query.fcgi?cmd=Retrieve&db=PubMed&dopt=Citation&list_uids=15759580)
- [36] B. Wu, Y. Li, C. Wang, D. B. Vigneron, and X. Zhang, "Multi-reception strategy with improved SNR for multichannel MR imaging," *PLoS One*, vol. 7, no. 8, p. e42237, 2012. [Online]. Available: [http://www.ncbi.nlm.nih.gov/entrez/query.fcgi?cmd=Retrieve&db=PubMed&dopt=Citation&list\\_uids=22879921](http://www.ncbi.nlm.nih.gov/entrez/query.fcgi?cmd=Retrieve&db=PubMed&dopt=Citation&list_uids=22879921)
- [37] X. Zhang *et al.*, "Human extremity imaging using microstrip resonators at 7T," in *Proceedings of the 21st Annual Meeting of ISMRM, Salt Lake City, USA, 2013*, p. 1675.
- [38] P. Marzola, F. Osculati, and A. Sbarbati, "High field MRI in preclinical research," *Eur J Radiol*, vol. 48, no. 2, pp. 165-70, Nov 2003, doi: 10.1016/j.ejrad.2003.08.007.
- [39] J. H. Duyn, "The future of ultra-high field MRI and fMRI for study of the human brain," *Neuroimage*, vol. 62, no. 2, pp. 1241-8, Aug 15 2012, doi: 10.1016/j.neuroimage.2011.10.065.
- [40] K. Ugurbil, "Magnetic resonance imaging at ultrahigh fields," *IEEE Trans Biomed Eng*, vol. 61, no. 5, pp. 1364-79, May 2014, doi: 10.1109/TBME.2014.2313619.
- [41] Y. Pang, B. Wu, X. Jiang, D. B. Vigneron, and X. Zhang, "Tilted Microstrip Phased Arrays With Improved Electromagnetic Decoupling for Ultrahigh-Field Magnetic Resonance Imaging," *Medicine*, vol. 93, no. 28, 2014. [Online]. Available: [https://journals.lww.com/md-journal/Fulltext/2014/12030/Tilted\\_Microstrip\\_Phased\\_Arrays\\_With\\_Improved.51.aspx](https://journals.lww.com/md-journal/Fulltext/2014/12030/Tilted_Microstrip_Phased_Arrays_With_Improved.51.aspx).
- [42] Y. Li and X. Zhang, "Advanced MR Imaging Technologies in Fetuses," *OMICS J Radiol*, vol. 1, no. 4, p. e113, Sep 2012, doi: 10.4172/2167-7964.1000e113.
- [43] J. Lu, Y. Pang, C. Wang, B. Wu, D. B. Vigneron, and X. Zhang, "Evaluation of Common RF Coil Setups for MR Imaging at Ultrahigh Magnetic Field: A Numerical Study," *Int Symp Appl Sci Biomed Commun Technol*, vol. 2011, 2011, doi: 10.1145/2093698.2093768.
- [44] Y. Zhang, Y. Liu, B. Sun, X. Zhang, and X. Jiang, "Practical design of multi - channel MOSFET RF transmission system for 7 T animal MR imaging," *Concepts in Magnetic Resonance Part B: Magnetic Resonance Engineering*, vol. 45, no. 4, pp. 191-200, 2015.
- [45] K. Payne, L. L. Ying, and X. Zhang, "Hairpin RF resonators for MR imaging transceiver arrays with high inter-channel isolation and B(1) efficiency at ultrahigh field 7 T," *J Magn Reson*, vol. 345, p. 107321, Dec 2022, doi: 10.1016/j.jmr.2022.107321.
- [46] K. Payne, A. A. Bhosale, and X. Zhang, "Double cross magnetic wall decoupling for quadrature transceiver RF array coils using common-mode differential-mode resonators," *J Magn Reson*, vol. 353, p. 107498, Aug 2023, doi: 10.1016/j.jmr.2023.107498.
- [47] K. Payne, Y. Zhao, A. A. Bhosale, and X. Zhang, "Dual-tuned Coaxial-transmission-line RF coils for Hyperpolarized (13)C and Deuterium (2)H Metabolic MRS Imaging at Ultrahigh Fields," *IEEE Trans Biomed Eng*, vol. PP, Dec 12 2023, doi: 10.1109/TBME.2023.3341760.
- [48] B. Wu *et al.*, "Multi-channel microstrip transceiver arrays using harmonics for high field MR imaging in humans," *IEEE Trans Med Imaging*, vol. 31, no. 2, pp. 183-91, Feb 2012. [Online]. Available: [http://www.ncbi.nlm.nih.gov/entrez/query.fcgi?cmd=Retrieve&db=PubMed&dopt=Citation&list\\_uids=21878410](http://www.ncbi.nlm.nih.gov/entrez/query.fcgi?cmd=Retrieve&db=PubMed&dopt=Citation&list_uids=21878410)
- [49] C. Wang *et al.*, "A practical multinuclear transceiver volume coil for in vivo MRI/MRS at 7 T," *Magn Reson Imaging*, vol. 30, no. 1, pp. 78-84, Jan 2012. [Online]. Available: [http://www.ncbi.nlm.nih.gov/entrez/query.fcgi?cmd=Retrieve&db=PubMed&dopt=Citation&list\\_uids=22055858](http://www.ncbi.nlm.nih.gov/entrez/query.fcgi?cmd=Retrieve&db=PubMed&dopt=Citation&list_uids=22055858)

- [50] X. Zhang, S. Ogawa, and W. Chen, "An inverted microstrip transmission line (iMTL) surface coil for 3T and 4T MR imaging," in *The 48th ENC*, Daytona Beach, FL, 2007.
- [51] O. Rutledge, T. Kwak, P. Cao, and X. Zhang, "Design and test of a double-nuclear RF coil for (1)H MRI and (13)C MRSI at 7T," *J Magn Reson*, vol. 267, pp. 15-21, Jun 2016, doi: 10.1016/j.jmr.2016.04.001.
- [52] Q. X. Yang *et al.*, "Manipulation of image intensity distribution at 7.0 T: passive RF shimming and focusing with dielectric materials," *J Magn Reson Imaging*, vol. 24, no. 1, pp. 197-202, Jul 2006. [Online]. Available: [http://www.ncbi.nlm.nih.gov/entrez/query.fcgi?cmd=Retrieve&db=PubMed&dopt=Citation&list\\_uids=16755543](http://www.ncbi.nlm.nih.gov/entrez/query.fcgi?cmd=Retrieve&db=PubMed&dopt=Citation&list_uids=16755543)
- [53] J. Wang *et al.*, "Polarization of the RF field in a human head at high field: a study with a quadrature surface coil at 7.0 T," *Magn Reson Med*, vol. 48, no. 2, pp. 362-9, Aug 2002. [Online]. Available: [http://www.ncbi.nlm.nih.gov/entrez/query.fcgi?cmd=Retrieve&db=PubMed&dopt=Citation&list\\_uids=12210945](http://www.ncbi.nlm.nih.gov/entrez/query.fcgi?cmd=Retrieve&db=PubMed&dopt=Citation&list_uids=12210945).
- [54] X. Zhang, K. Ugurbil, and W. Chen, "A microstrip transmission line volume coil for human head MR imaging at 4T," *J Magn Reson*, vol. 161, no. 2, pp. 242-51, Apr 2003. [Online]. Available: [http://www.ncbi.nlm.nih.gov/entrez/query.fcgi?cmd=Retrieve&db=PubMed&dopt=Citation&list\\_uids=12713976](http://www.ncbi.nlm.nih.gov/entrez/query.fcgi?cmd=Retrieve&db=PubMed&dopt=Citation&list_uids=12713976)
- [55] X. Zhang, K. Ugurbil, and W. Chen, "Microstrip RF surface coil design for extremely high-field MRI and spectroscopy," *Magn Reson Med*, vol. 46, no. 3, pp. 443-50., 2001.
- [56] B. Wu *et al.*, "Shielded microstrip array for 7T human MR imaging," *IEEE Trans Med Imaging*, vol. 29, no. 1, pp. 179-84, Jan 2010. [Online]. Available: [http://www.ncbi.nlm.nih.gov/entrez/query.fcgi?cmd=Retrieve&db=PubMed&dopt=Citation&list\\_uids=19822470](http://www.ncbi.nlm.nih.gov/entrez/query.fcgi?cmd=Retrieve&db=PubMed&dopt=Citation&list_uids=19822470)
- [57] B. Wu *et al.*, "Multi-purpose Flexible Transceiver Array at 7T," in *17th Annual Meeting of ISMRM*, 2009, p. 107.
- [58] B. Wu *et al.*, "Flexible transceiver array for ultrahigh field human MR imaging," *Magn Reson Med*, vol. 68, no. 4, pp. 1332-8, Oct 2012. [Online]. Available: [http://www.ncbi.nlm.nih.gov/entrez/query.fcgi?cmd=Retrieve&db=PubMed&dopt=Citation&list\\_uids=22246803](http://www.ncbi.nlm.nih.gov/entrez/query.fcgi?cmd=Retrieve&db=PubMed&dopt=Citation&list_uids=22246803)
- [59] Y. Li, C. Wang, B. Yu, D. Vigneron, W. Chen, and X. Zhang, "Image homogenization using pre-emphasis method for high field MRI," *Quant Imaging Med Surg*, vol. 3, no. 4, pp. 217-23, Aug 2013. [Online]. Available: [http://www.ncbi.nlm.nih.gov/entrez/query.fcgi?cmd=Retrieve&db=PubMed&dopt=Citation&list\\_uids=24040618](http://www.ncbi.nlm.nih.gov/entrez/query.fcgi?cmd=Retrieve&db=PubMed&dopt=Citation&list_uids=24040618)
- [60] Y. Li, Z. Xie, Y. Pang, D. Vigneron, and X. Zhang, "ICE decoupling technique for RF coil array designs," *Med Phys*, vol. 38, no. 7, pp. 4086-93, Jul 2011. [Online]. Available: [http://www.ncbi.nlm.nih.gov/entrez/query.fcgi?cmd=Retrieve&db=PubMed&dopt=Citation&list\\_uids=21859008](http://www.ncbi.nlm.nih.gov/entrez/query.fcgi?cmd=Retrieve&db=PubMed&dopt=Citation&list_uids=21859008)
- [61] X. Yan, L. Wei, R. Xue, and X. Zhang, "Hybrid monopole/loop coil array for human head MR imaging at 7T," *Appl Magn Reson*, vol. 46, no. 5, pp. 541-550, May 1 2015, doi: 10.1007/s00723-015-0656-5.
- [62] Y. Pang, B. Wu, C. Wang, D. B. Vigneron, and X. Zhang, "Numerical Analysis of Human Sample Effect on RF Penetration and Liver MR Imaging at Ultrahigh Field," *Concepts Magn Reson Part B Magn Reson Eng*, vol. 39B, no. 4, pp. 206-216, Oct 2011. [Online]. Available: [http://www.ncbi.nlm.nih.gov/entrez/query.fcgi?cmd=Retrieve&db=PubMed&dopt=Citation&list\\_uids=22337345](http://www.ncbi.nlm.nih.gov/entrez/query.fcgi?cmd=Retrieve&db=PubMed&dopt=Citation&list_uids=22337345)
- [63] Y. Pang and X. Zhang, "Multi-voxel Excitation using Compressed Sensing Typed Sparse Pulse," in *the 18th Annual meeting of ISMRM Stockholm, Sweden*, 2010, p. 4952.
- [64] J. P. Marques, F. F. J. Simonis, and A. G. Webb, "Low-field MRI: An MR physics perspective," *J Magn Reson Imaging*, vol. 49, no. 6, pp. 1528-1542, Jun 2019, doi: 10.1002/jmri.26637.
- [65] A. E. Campbell-Washburn *et al.*, "Opportunities in Interventional and Diagnostic Imaging by Using High-Performance Low-Field-Strength MRI," *Radiology*, vol. 293, no. 2, pp. 384-393, Nov 2019, doi: 10.1148/radiol.2019190452.
- [66] B. Wu, J. Gao, J. Yao, C. Zhang, and X. Zhang, "Design of a Strip Transmit Coil/Array for Low Field Open MR," *Proc Int Soc Magn Reson Med*, p. 1092, 2008.
- [67] J. Xu *et al.*, "Design and Testing of a Multi-Channel 1H/3He Double-Nuclear Transmit Coil Array for Magnetic Resonance Imaging at an Ultra-Low Field," *Journal of Medical Imaging and Health Informatics*, vol. 9, no. 1, pp. 119-125, 2019, doi: <https://doi.org/10.1166/jmihi.2019.2549>.
- [68] T. C. Arnold, C. W. Freeman, B. Litt, and J. M. Stein, "Low-field MRI: Clinical promise and challenges," *J Magn Reson Imaging*, vol. 57, no. 1, pp. 25-44, Jan 2023, doi: 10.1002/jmri.28408.
- [69] D. I. Hoult and R. E. Richards, "The signal-to-noise ratio of the nuclear magnetic resonance experiment," *J Magn Reson*, vol. 24, pp. 71-85, 1976.
- [70] C. N. Chen, V. J. Sank, S. M. Cohen, and D. I. Hoult, "The field dependence of NMR imaging. I. Laboratory assessment of signal-to-noise ratio and power deposition," *Magn Reson Med*, vol. 3, no. 5, pp. 722-9, 1986.
- [71] K. Ugurbil *et al.*, "Ultrahigh field magnetic resonance imaging and spectroscopy," *Magn Reson Imaging*, vol. 21, no. 10, pp. 1263-81, Dec 2003, doi: 10.1016/j.mri.2003.08.027.
- [72] H. Qiao, X. Zhang, X.-H. Zhu, F. Du, and W. Chen, "In vivo 31P MRS of human brain at high/ultrahigh fields: a quantitative comparison of NMR detection sensitivity and spectral resolution between 4 T and 7 T," *Magnetic Resonance Imaging*, vol. 24, no. 10, pp. 1281-1286, 2006/12/01/ 2006, doi: <https://doi.org/10.1016/j.mri.2006.08.002>.



- [73] K. Ugurbil *et al.*, "Magnetic resonance studies of brain function and neurochemistry," *Annu Rev Biomed Eng*, vol. 2, pp. 633-660, 2000.
- [74] X. H. Zhu *et al.*, "Quantitative imaging of energy expenditure in human brain," *Neuroimage*, vol. 60, no. 4, pp. 2107-17, May 1 2012, doi: 10.1016/j.neuroimage.2012.02.013.
- [75] X. H. Zhu *et al.*, "Development of  $(17)O$  NMR approach for fast imaging of cerebral metabolic rate of oxygen in rat brain at high field," *Proc Natl Acad Sci U S A*, vol. 99, no. 20, pp. 13194-9, Oct 1 2002, doi: 10.1073/pnas.202471399.
- [76] Y. Zhao, A. Bhosale, and X. Zhang, "Multimodal surface coils for low-field MR imaging," *Proc Int Soc Magn Reson Med*, vol. 32, p. 1325, 2024.
- [77] Y. Zhao, A. Bhosale, and X. Zhang, "Multimodal surface coils for small animal MR imaging at ultrahigh fields," *Proc Intl Soc Mag Reson Med*, vol. 32, p. 1596, 2024.
